# Supplementary material for: QNBC Is Associated with High Genomic Instability Characterized by Copy Number Alterations and miRNA Deregulation
Source: MDPI journal article supplement (doi:10.3390/ijms222111548), 2021-10-26
Supplement: s1 [file s1]

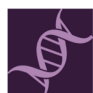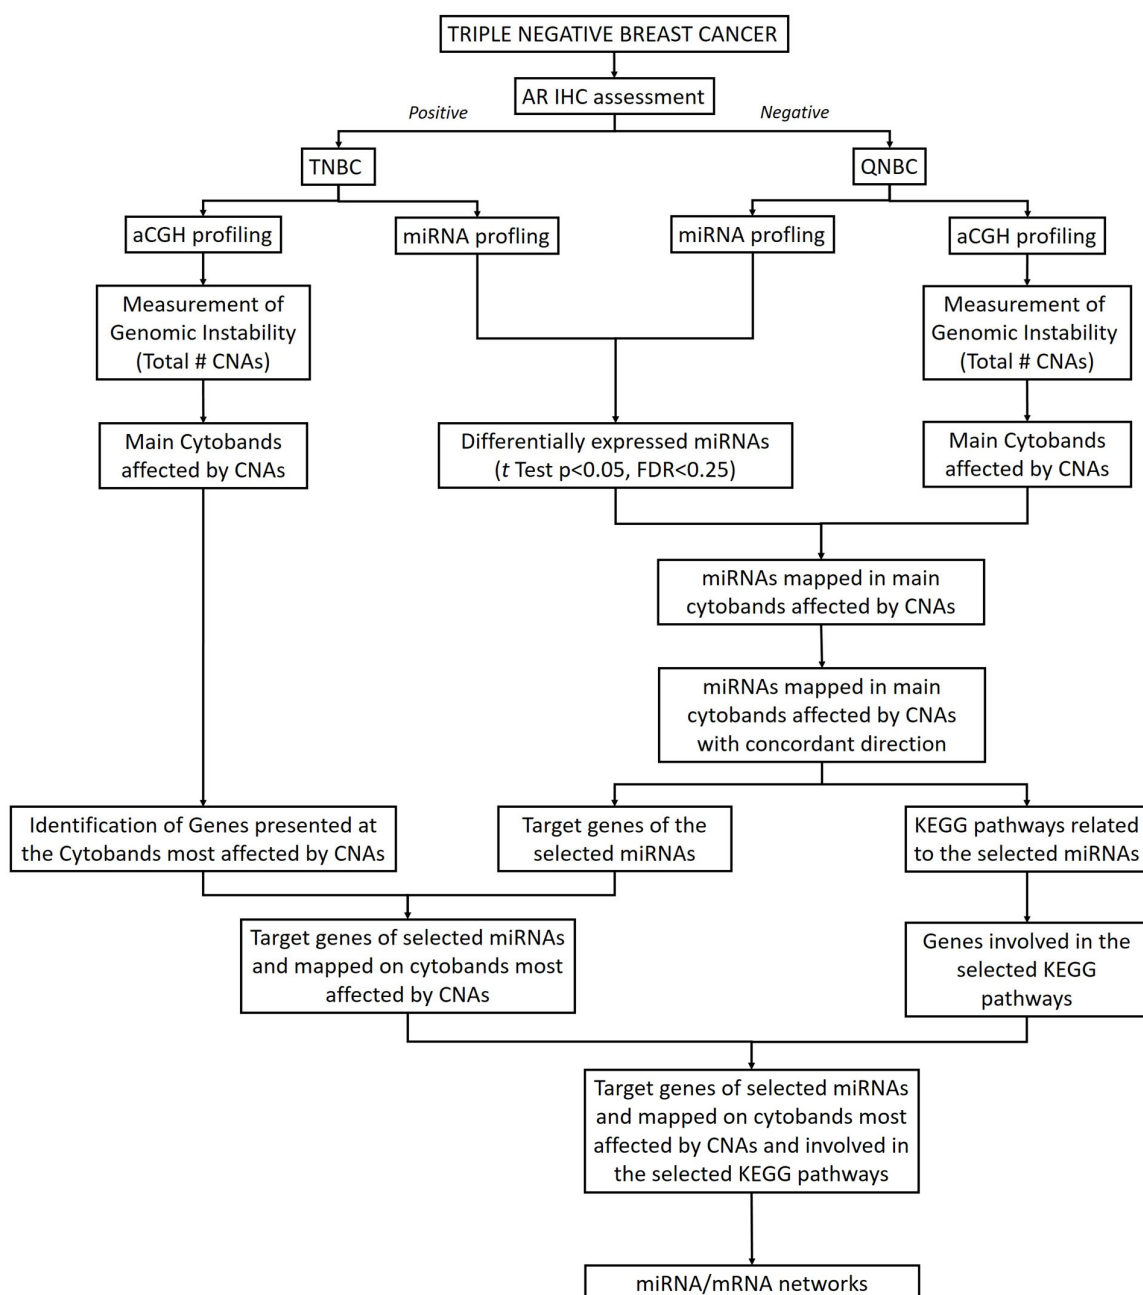

Figure S1. Study design

**Table S1.** Copy number analysis of genes in the CA20 signature based on the mean probe and interval -values

| Gene          | Mean Probe Log Ratio |              |                 | Mean Interval Log Ratio |              |                 |
|---------------|----------------------|--------------|-----------------|-------------------------|--------------|-----------------|
|               | QNBC                 | TNBC         | <i>p</i> -value | QNBC                    | TNBC         | <i>p</i> -value |
| <i>AURKA</i>  | 0.31 ± 0.44          | 0.44 ± 0.48  | > 0.05          | 0.11 ± 0.20             | 0.005 ± 0.10 | < 0.10          |
| <i>CCNA2</i>  | -0.05 ± 0.27         | -0.21 ± 0.28 | > 0.05          | 0.008 ± 0.11            | 0.001 ± 0.10 | > 0.05          |
| <i>CCND1</i>  | -0.26 ± 0.84         | -0.25 ± 0.42 | > 0.05          | 0.16 ± 0.38             | 0.03 ± 0.11  | > 0.05          |
| <i>CCNE2</i>  | 0.43 ± 0.53          | 0.17 ± 0.39  | > 0.05          | 0.36 ± 0.33             | 0.23 ± 0.22  | > 0.05          |
| <i>CDK1</i>   | 0.64 ± 0.37          | 0.70 ± 0.34  | > 0.05          | 0.05 ± 0.11             | 0.03 ± 0.10  | > 0.05          |
| <i>CEP63</i>  | -0.06 ± 0.28         | -0.13 ± 0.42 | > 0.05          | 0.13 ± 0.19             | 0.08 ± 0.13  | > 0.05          |
| <i>CEP152</i> | 0.26 ± 0.65          | 0.47 ± 0.53  | > 0.05          | 0.02 ± 0.08             | 0 ± 0        | > 0.05          |
| <i>E2F1</i>   | 0.5 ± 0.48           | 0.59 ± 0.54  | > 0.05          | 0.08 ± 0.20             | 0.03 ± 0.10  | > 0.05          |
| <i>E2F2</i>   | 0.10 ± 0.66          | -0.20 ± 0.38 | > 0.05          | 0.04 ± 0.11             | -0.02 ± 0.07 | > 0.05          |
| <i>LMO4</i>   | 0.23 ± 0.42          | 0.07 ± 0.6   | > 0.05          | 0.13 ± 0.27             | 0 ± 0        | < 0.10          |
| <i>MDM2</i>   | 0.25 ± 0.27          | 0.24 ± 0.26  | > 0.05          | 0.03 ± 0.12             | 0 ± 0        | > 0.05          |
| <i>MYCN</i>   | 0.05 ± 0.38          | 0.01 ± 0.12  | > 0.05          | 0.10 ± 0.16             | 0.04 ± 0.11  | > 0.05          |
| <i>NDRG1</i>  | 0.48 ± 0.43          | 0.41 ± 0.37  | > 0.05          | 0.44 ± 0.34             | 0.31 ± 0.24  | > 0.05          |
| <i>NEK2</i>   | 0.66 ± 0.49          | 0.45 ± 0.28  | > 0.05          | 0.40 ± 0.34             | 0.20 ± 0.32  | > 0.05          |
| <i>PIN1</i>   | 0.22 ± 0.65          | -0.05 ± 0.65 | > 0.05          | 0.03 ± 0.16             | 0.02 ± 0.08  | > 0.05          |
| <i>PLK1</i>   | -0.18 ± 0.30         | -0.29 ± 0.61 | > 0.05          | 0.01 ± 0.12             | -0.02 ± 0.08 | > 0.05          |
| <i>PLK4</i>   | -0.06 ± 0.35         | -0.04 ± 0.28 | > 0.05          | 0.008 ± 0.11            | -0.02 ± 0.09 | > 0.05          |
| <i>SASS6</i>  | -0.18 ± 0.33         | -0.26 ± 0.26 | > 0.05          | 0.09 ± 0.21             | 0.001 ± 0.10 | > 0.05          |
| <i>STIL</i>   | 0.13 ± 0.40          | -0.10 ± 0.30 | < 0.10          | 0.09 ± 0.23             | 0.03 ± 0.10  | > 0.05          |
| <i>TUBG1</i>  | 0.15 ± 0.45          | -0.13 ± 0.53 | > 0.05          | 0 ± 0                   | -0.03 ± 0.12 | > 0.05          |

**Table S2.** Copy number analysis of genes in the CIN25 signature based on the mean probe and interval log-ratio values

|                           | Mean Probe Log Ratio |               |         | Mean Interval Log Ratio |              |                 |
|---------------------------|----------------------|---------------|---------|-------------------------|--------------|-----------------|
|                           | QNBC                 | TNBC          | p-value | QNBC                    | TNBC         | p-value         |
| TPX2                      | 0.12 ± 0.42          | -0.12 ± 0.42  | > 0.05  | 0.08 ± 0.20             | 0.03 ± 0.10  | > 0.05          |
| PRC1                      | 0.01 ± 0.20          | 0.28 ± 0.33   | < 0.10  | 0.06 ± 0.18             | 0 ± 0        | > 0.05          |
| <b>FOXM1</b>              | -0.29 ± 0.56         | -0.36 ± 0.60  | > 0.05  | 0.37 ± 0.42             | 0.06 ± 0.14  | <b>0.0169*</b>  |
| CDC2 (CDK1)               | 0.64 ± 0.37          | 0.71 ± 0.34   | > 0.05  | 0.05 ± 0.11             | 0.03 ± 0.10  | > 0.05          |
| C20orf24-TGIF2            | 0.63 ± 0.40          | 0.6 ± 0.32    | > 0.05  | 0.06 ± 0.17             | 0.03 ± 0.10  | > 0.05          |
| MCM2                      | -0.19 ± 0.35         | -0.58 ± 0.70  | < 0.10  | 0.06 ± 0.15             | 0.05 ± 0.11  | > 0.05          |
| H2AFZ                     | 0.85 ± 1.29          | 0.99 ± 0.73   | > 0.05  | 0.04 ± 0.13             | 0.02 ± 0.07  | > 0.05          |
| TOP2A                     | 0.09 ± 0.39          | 0.06 ± 0.47   | > 0.05  | 0 ± 0                   | 0.10 ± 0.37  | > 0.05          |
| PCNA                      | 0.37 ± 0.38          | 0.32 ± 0.23   | > 0.05  | 0.02 ± 0.14             | 0.02 ± 0.07  | > 0.05          |
| UBE2C                     | 0.20 ± 0.30          | 0.27 ± 0.26   | > 0.05  | 0.08 ± 0.15             | 0.003 ± 0.10 | > 0.05          |
| MELK                      | -0.005 ± 0.21        | -0.07 ± 0.26  | > 0.05  | 0.10 ± 0.16             | 0.02 ± 0.08  | > 0.05          |
| TRIP13                    |                      | No probe      |         | -0.02 ± 0.22            | 0 ± 0        | > 0.05          |
| <b>CNAP1<br/>(NCAPD2)</b> | 0.93 ± 1.04          | 0.76 ± 0.66   | > 0.05  | 0.37 ± 0.37             | 0.06 ± 0.14  | <b>0.0068**</b> |
| MCM7                      | 0.24 ± 0.31          | 0.19 ± 0.37   | > 0.05  | 0.12 ± 0.21             | 0.08 ± 0.16  | > 0.05          |
| RNASEH2A                  | -0.003 ± 0.52        | 0.06 ± 0.53   | > 0.05  | 0.12 ± 0.24             | 0.02 ± 0.08  | > 0.05          |
| <b>RAD51AP1</b>           | 0.44 ± 0.48          | 0.10 ± 0.46   | < 0.10  | 0.33 ± 0.39             | 0.06 ± 0.14  | <b>0.0231*</b>  |
| KIF20A                    | -0.14 ± 0.37         | -0.30 ± 0.39  | > 0.05  | -0.01 ± 0.06            | 0 ± 0        | > 0.05          |
| CDC45L                    | 0.14 ± 0.26          | 0.07 ± 0.31   | > 0.05  | 0.06 ± 0.13             | 0 ± 0        | > 0.05          |
| MAD2L1                    | 0.19 ± 0.46          | 0.36 ± 0.52   | > 0.05  | 0.008 ± 0.11            | 0.001 ± 0.10 | > 0.05          |
| ESPL1                     | 0.11 ± 0.87          | -0.17 ± 0.40  | > 0.05  | -0.01 ± 0.06            | 0 ± 0        | > 0.05          |
| CCNB2                     | 0.25 ± 0.29          | 0.15 ± 0.38   | > 0.05  | 0.04 ± 0.12             | 0 ± 0        | > 0.05          |
| FEN1                      | -0.07 ± 0.64         | 0.05 ± 0.82   | > 0.05  | 0.05 ± 0.12             | 0.02 ± 0.09  | > 0.05          |
| TTK                       | 0.22 ± 0.44          | 0.02 ± 0.29   | > 0.05  | 0.10 ± 0.17             | 0.02 ± 0.09  | > 0.05          |
| CCT5                      |                      | No probe      |         | 0.06 ± 0.27             | 0.02 ± 0.09  | > 0.05          |
| RFC4                      | 0.24 ± 0.32          | -0.003 ± 0.45 | > 0.05  | 0.09 ± 0.18             | 0.10 ± 0.14  | > 0.05          |

**Table S3.** Top 25 pathways (based on *p*-value) regulated by the eight miRNAs differentially expressed between QNBC and TNBC samples

|   | KEGG pathway                                               | <i>p</i> -value | #genes | genes                                                                                                                                                                                                                                                                                               | #miRNAs | miRNAs                                                                      |
|---|------------------------------------------------------------|-----------------|--------|-----------------------------------------------------------------------------------------------------------------------------------------------------------------------------------------------------------------------------------------------------------------------------------------------------|---------|-----------------------------------------------------------------------------|
| 1 | Glycosphingolipid biosynthesis - lacto and neolacto series | 1.12E-13        | 7      | <i>B3GNT5, FUT4, FUT3, B3GNT1, B4GALT4, FUT9, ST8SIA1</i>                                                                                                                                                                                                                                           | 3       | miR-23c, miR-613, miR-548ai                                                 |
| 2 | Proteoglycans in cancer                                    | 1.72E-06        | 44     | <i>BRAF, PRKCA, FZD5, MET, EZR, SMAD2, THBS1, PIK3CB, MAPK14, ROCK2, FRS2, RDX, EGFR, TLR4, CAV2, KRAS, FZD3, PTK2, CBLB, PPP1R12A, PIK3R3, HIF1A, EIF4B, ITPR1, DD5, SRC, MAPK3, FAS, IGF1, GAB1, IL12B, ANK1, AKT3, PLCE1, HOXD10, SMO, PDK1, ITPR3, VEGFA, PLA2, GRB2, ERBB4, PRKACB, PPP1CB</i> | 8       | miR-567, miR-548ai, miR-1204, miR-1265, miR-613, miR-1267, miR-943, miR-23c |
| 3 | TGF-beta signaling pathway                                 | 1.20E-05        | 17     | <i>FST, TGFBR1, SMAD2, THBS1, PPP2CA, SMURF2, BMPR1B, SMAD3, ACVR2B, SMAD4, E2F5, MAPK3, ACVR1C, BMPR1A, CREBBP, TGFBR2</i>                                                                                                                                                                         | 6       | miR-567, miR-23c, miR-548ai, miR-613, miR-1267, miR-943                     |
| 4 | Renal cell carcinoma                                       | 0.000289        | 20     | <i>BRAF, MET, CRK, PIK3CB, PAK2, TGFA, RAP1A, ARNT, KRAS, PAK3, PIK3R3, HIF1A, MAPK3, EGLN2, GAB1, AKT3, VEGFA, CREBBP, GRB2, RAP1B</i>                                                                                                                                                             | 8       | miR-567, miR-548ai, miR-1204, miR-1265, miR-613, miR-1267, miR-943, miR-23c |
| 5 | Gap junction                                               | 0.001777        | 20     | <i>PRKCA, GUCY1B3, ADCY1, GRM5, EGFR, TJP1, KRAS, LPAR1, ITPR1, SRC, MAPK3, PDGFC, GUCY1A2, GJA1, PRKG1, ITPR3, GRB2, PRKACB, HTR2A, PDGFA</i>                                                                                                                                                      | 6       | miR-548ai, miR-23c, miR-1204, miR-1267, miR-613, miR-1265                   |
| 6 | FoxO signaling pathway                                     | 0.001834        | 32     | <i>IRS2, BRAF, TGFBR1, FBXO32, SMAD2, PRKAA2, STK4, PIK3CB, MAPK14, SMAD2, CAT, TNFSF10, EGFR, KRAS,</i>                                                                                                                                                                                            | 8       | miR-567, miR-548ai, miR-1204, miR-1265, miR-613, miR-1267, miR-943, miR-23c |

|    |                                                                         |          |    |                                                                                                                                                                                                                                                                                                        |   |                                                                             |
|----|-------------------------------------------------------------------------|----------|----|--------------------------------------------------------------------------------------------------------------------------------------------------------------------------------------------------------------------------------------------------------------------------------------------------------|---|-----------------------------------------------------------------------------|
|    |                                                                         |          |    | NLK, PIK3R3, SMAD4, AGAP2, GABARAPL1, PCK1, MAPK3, IGF1, AKT3, ATG12, PDPK1, PTEN, SGK3, CREBBP, GRB2, TGFB2, BCL2L11, MAPK10                                                                                                                                                                          |   |                                                                             |
| 7  | mTOR signaling pathway                                                  | 0.00211  | 19 | BRAF, PRKCA, PRKAA2, PIK3CB, RICTOR, PIK3R3, EIF4E, HIF1A, EIF4B, MAPK3, RPS6KA3, IGF1, AKT3, PDPK1, VEGFA, PTEN, CAB39, ULK2, CAB39L                                                                                                                                                                  | 6 | miR-548ai, miR-567, miR-613, miR-23c, miR-1267, miR-1265                    |
| 8  | ErbB signaling pathway                                                  | 0.002563 | 21 | BRAF, PRKCA, CRK, PIK3CB, PAK2, TGFA, EGFR, KRAS, PAK3, PTK2, CBLB, PIK3R3, NCK2, SRC, MAPK3, GAB1, AKT3, MAP2K4, GRB2, ERBB4, MAPK10                                                                                                                                                                  | 7 | miR-23c, miR-613, miR-1267, miR-943, miR-1204, miR-1265, miR-548ai          |
| 9  | Focal adhesion                                                          | 0.003939 | 43 | BRAF-PRKCA, ACTN2, MET, ITGB8, CRK, THBS1, PIK3CB, PAK2, COL4A5, RAP1A, ROCK2, ITGB6, BCL2, EGFR, CAV2, ITGA1, PAK3, PTK2, PPP1R12A, PIK3R3, PARVA, RELN, COL4A4, ITGA10, SRC, MAPK3, IGF1, ITGA7, AKT3, PDGFC, COL11A1, COL6A3, PDPK1, VEGFA, PTEN, GRB2, RAP1B, ARHGAP5, MAPK10, XIAP, PPP1CB, PDGFA | 8 | miR-567, miR-548ai, miR-1204, miR-1265, miR-613, miR-1267, miR-943, miR-23c |
| 10 | Synaptic vesicle cycle                                                  | 0.005665 | 12 | SNAP25, STX3, ATP6V1E1, SLAC17A6, CLTC, SYTI, ATP6VIA, CPLX2, ATP6V0A1, ATP6V1C1, DNMT3, VAMP2                                                                                                                                                                                                         | 4 | miR-613, miR-23c, miR-548ai, miR-1204                                       |
| 11 | Glycosaminoglycan biosynthesis - chondroitin sulfate / dermatan sulfate | 0.005937 | 4  | UST, CHSY3, CHST7, CHSY1                                                                                                                                                                                                                                                                               | 2 | miR-613, miR-23c                                                            |
| 12 | Hepatitis B                                                             | 0.006264 | 29 | PRKCA, TGFB1, ATF2, CCNA2, PIK3CB, SMAD3, BCL2, MAP3K1, TLR4, KRAS, YWHAQ, EGR3, APAF1, LAMTOR5,                                                                                                                                                                                                       | 7 | miR-548ai, miR-567, miR-23c, miR-613, miR-1204, miR-1265, miR-943           |

|    |                                                          |          |    |                                                                                                                                                                                                                  |   |                                                                             |
|----|----------------------------------------------------------|----------|----|------------------------------------------------------------------------------------------------------------------------------------------------------------------------------------------------------------------|---|-----------------------------------------------------------------------------|
|    |                                                          |          |    | <i>PIK3R3, SMAD4, NFATC2, TIRAP, YWHAZ, SRC, MAPK3, FAS, AKT3, MAP2K4, PTEN, NFATC3, CREBBP, GRB2, MAPK10</i>                                                                                                    |   |                                                                             |
| 13 | Hippo signaling pathway                                  | 0.008818 | 20 | <i>FZD5, TGFB1, YAP1, SMAD2, PPP2CA, BMPR1B, YWHAG, SMAD3, MOB1B, WWC1, FZD3, YWHAQ, MPP5, SMAD4, TEAD1, YWHAZ, BMPR1A, DLG2, TGFB2, PPP1CB</i>                                                                  | 6 | miR-613, miR-567, miR-23c, miR-1267, miR-548ai, miR-943                     |
| 14 | Long-term potentiation                                   | 0.010112 | 18 | <i>BRAF, PRKCA, ADCY1, CAMK4, RAP1A, GRM5, GRIA1, KRAS, CALM2, ITPR1, MAPK3, RPS6KA3, ITPR3, CREBBP, RAP1B, PRKACB, PPP1CB, GRIN2B</i>                                                                           | 5 | miR-548ai, miR-23c, miR-1267, miR-613, miR-567                              |
| 15 | Glioma                                                   | 0.013863 | 14 | <i>BRAF, PRKCA, PIK3CB, TGFA, EGFR, KRAS, CALM2, PIK3R3, MAPK3, IGF1, AKT3, PTEN, GRB2, PDGFA</i>                                                                                                                | 5 | miR-613, miR-23c, miR-548ai, miR-1204, miR-1265                             |
| 16 | Non-small cell lung cancer                               | 0.014635 | 14 | <i>BRAF, PRKCA, STK4, PIK3CB, TGFA, EML4, RARB, EGFR, KRAS, PIK3R3, MAPK3, AKT3, PDPK1, GRB2</i>                                                                                                                 | 5 | miR-1265, miR-23c, miR-613, miR-548ai, miR-1204                             |
| 17 | Signaling pathways regulating pluripotency of stem cells | 0.014635 | 28 | <i>JARID2, FZD5, KAT6A, PAX6, SMAD2, PIK3CB, BMPR1B, MAPK14, SMAD3, SMARCA1, ZFXH3, KRAS, FZD3, ACVR2B, PCGF5, RIF1, PIK3R3, SMAD4, LIFR, SMAD5, MAPK3, ACVR1C, IGF1, AKT3, BMPR1A, GRB2, MEIS1, COMMD3-BM11</i> | 8 | miR-567, miR-548ai, miR-1204, miR-1265, miR-613, miR-1267, miR-943, miR-23c |
| 18 | Sphingolipid metabolism                                  | 0.016518 | 9  | <i>ASAHI, SGPL1, SGMS1, CERS2, ACER2, SPTLC3, ASAH2, CERS5, SGPP1</i>                                                                                                                                            | 5 | miR-943, miR-567, miR-613, miR-23c, miR-548ai                               |
| 19 | Mucin type O-Glycan biosynthesis                         | 0.019015 | 6  | <i>GALNT7, B4GALT5, GCNT4, GALNT1, GALNT10, GALNT12</i>                                                                                                                                                          | 3 | miR-943, miR-548ai, miR-23c                                                 |

|    |                                         |          |    |                                                                                                                                                                                    |   |                                                                             |
|----|-----------------------------------------|----------|----|------------------------------------------------------------------------------------------------------------------------------------------------------------------------------------|---|-----------------------------------------------------------------------------|
| 20 | Axon guidance                           | 0.019015 | 23 | <i>EFNB2, MET, CXCR4, PAK2, ROCK2, ROBO2, CXCL12, KRAS, PAK3, PTK2, DCC, EPHA3, NCK2, NFATC2, CFL2, NRP1, MAPK3, PLXNC1, ROBO1, SEMA6D, NFATC3, LRRC4, EPHB1</i>                   | 5 | miR-613, miR-23c, miR-1267, miR-548ai, miR-943                              |
| 21 | Progesterone-mediated oocyte maturation | 0.019015 | 21 | <i>BRAF, ADCY1, PGR, CCNA2, PIK3CB, CPEB4, MAPK14, PDE2A, CPEB1, KRAS, PIK3R3, CPEB2, MAPK3, MAD2L1, RPS6KA3, IGF1, AKT3, CDC27, CPEB3, MAPK10, PRKACB</i>                         | 8 | miR-567, miR-548ai, miR-1204, miR-1265, miR-613, miR-1267, miR-943, miR-23c |
| 22 | Sphingolipid signaling pathway          | 0.02042  | 24 | <i>ASAH1, PRKCA, PPP2R5E, POL3CB, PPP2CA, SGPL1, MAPK14, ROCK2, BCL2, KRAS, SGMS1, CERS2, PIK3R3, ACER2, SPTLC3, ASAH2, CERS5, MAPK3, AKT3, PDPK1, SGPP1, PTEN, MAP3K5, MAPK10</i> | 7 | miR-613, miR-1267, miR-23c, miR-943, miR-567, miR-548ai, miR-1265           |
| 23 | Dorso-ventral axis formation            | 0.030846 | 9  | <i>CPEB4, CPEB1, EGFR, KRAS, CPEB2, MAPK3, NOTCH3, CPEB3, GRB2</i>                                                                                                                 | 5 | miR-548ai, miR-23c, miR-1204, miR-513, miR-943                              |
| 24 | Pancreatic cancer                       | 0.032977 | 16 | <i>BRAF, TGFBR1, SMAD2, PIK3CB, TGFA, SMAD3, EGFR, ARHGEF6, KRAS, PIK3R3, SMAD4, MAPK3, AKT3, VEGFA, TGFBR2, MAPK10</i>                                                            | 7 | miR-1267, miR-548ai, miR-23c, miR-613, miR-943, miR-1265, miR-567           |
| 25 | Adherens junction                       | 0.036425 | 18 | <i>ACTN2, CSNK2A2, TGFBR1, MET, SMAD2, SMAD3, EGFR, TJP1, MLLT4, NLK, SMAD4, FER, SER, MAPK3, PVRL3, PTPRB, CREBBP TGFBR2</i>                                                      | 7 | Mir-613, Mir-1267, Mir-23Cc, miR-567, miR-1204, miR-548ai, miR-943          |

**Table S4.** Discriminatory power of the eight miRNAs

| miRNA           | AUC    | 95% CI        |
|-----------------|--------|---------------|
| miR-1204        | 0.7333 | 0.5452–0.9215 |
| miR-1265        | 0.6792 | 0.4929–0.8655 |
| miR-1267        | 0.6667 | 0.4755–0.8578 |
| miR-23c         | 0.7250 | 0.5480–0.9020 |
| miR-548ai       | 0.7417 | 0.5628–0.9205 |
| miR-567         | 0.7583 | 0.5879–0.9288 |
| miR-613         | 0.7417 | 0.5619–0.9215 |
| miR-943         | 0.7417 | 0.5636–0.9198 |
| Combined miRNAs | 0.946  | 0.8687–1.0000 |

Note: The ability of the miRNAs to discriminate between QNBC and TNBCs samples was evaluated by receiver operating characteristic curve analysis. Results are presented as area under the curve (AUC) values and 95% confidence intervals (CIs).
